# Supplementary material for: SILAC-based quantification reveals modulation of the immunopeptidome in BRAF and MEK inhibitor sensitive and resistant melanoma cells
Source: Front Immunol. 2025 Jan 6;15:1490821. doi: 10.3389/fimmu.2024.1490821 (PMC11744270; doi:10.3389/fimmu.2024.1490821)
Supplement: Supplementary file 6 [file Table5.xlsx]

## Sheet: Sheet1
symbol	category	citation
PMEL	MDA	Takeuchi, H., Kuo, C., Morton, D. L., Wang, H. J. & Hoon, D. S. B. Expression of differentiation melanoma-associated antigen genes is associated with favorable disease outcome in advanced-stage melanomas. Cancer Res 63, (2003).
DCT	MDA	Sun, Q. et al. Dedifferentiation maintains melanocyte stem cells in a dynamic niche. Nature 2023 616:7958 616, 774–782 (2023).
SOX10	MDA	Willis, B. C., Johnson, G., Wang, J. & Cohen, C. SOX10: a useful marker for identifying metastatic melanoma in sentinel lymph nodes. Appl Immunohistochem Mol Morphol 23, 109–112 (2015).
TYR	MDA	Takeuchi, H., Kuo, C., Morton, D. L., Wang, H. J. & Hoon, D. S. B. Expression of differentiation melanoma-associated antigen genes is associated with favorable disease outcome in advanced-stage melanomas. Cancer Res 63, (2003).
RAB38	MDA	Zippelius, A. et al. Melanocyte differentiation antigen RAB38/NY-MEL-1 induces frequent antibody responses exclusively in melanoma patients. Cancer Immunol Immunother 56, 249–258 (2007).
NUF2	CGA	Gillette, M. A. et al. Proteogenomic Characterization Reveals Therapeutic Vulnerabilities in Lung Adenocarcinoma. Cell 182, 200-225.e35 (2020).
PRAME	CGA	Kern, C. H., Yang, M. & Liu, W. S. The PRAME family of cancer testis antigens is essential for germline development and gametogenesis†. Biol Reprod 105, 290–304 (2021).
